# Supplementary material for: Gender variations in citation distributions in medicine are very small and due to self-citation and journal prestige
Source: eLife journal article supplement (doi:10.7554/elife.45374), 2019-07-15
Supplement: supp [file elife_poa_e45374_Figure_7_figure_supplement_1.docx]

**Matched papers per journal**

Figure 7-figure supplement 1 shows the percentage of papers per journal included in the analysis. The excluded papers are a combination of missing document types in Web of Science and missing name information. Journals publishing document types which are included in PubMed Medline but not Web of Science (e.g. comments, notes) can account for a large exclusion percentage for many journals. For other journals, first name information is consistently missing for some or all years. Here showing journals with > 50 papers only.


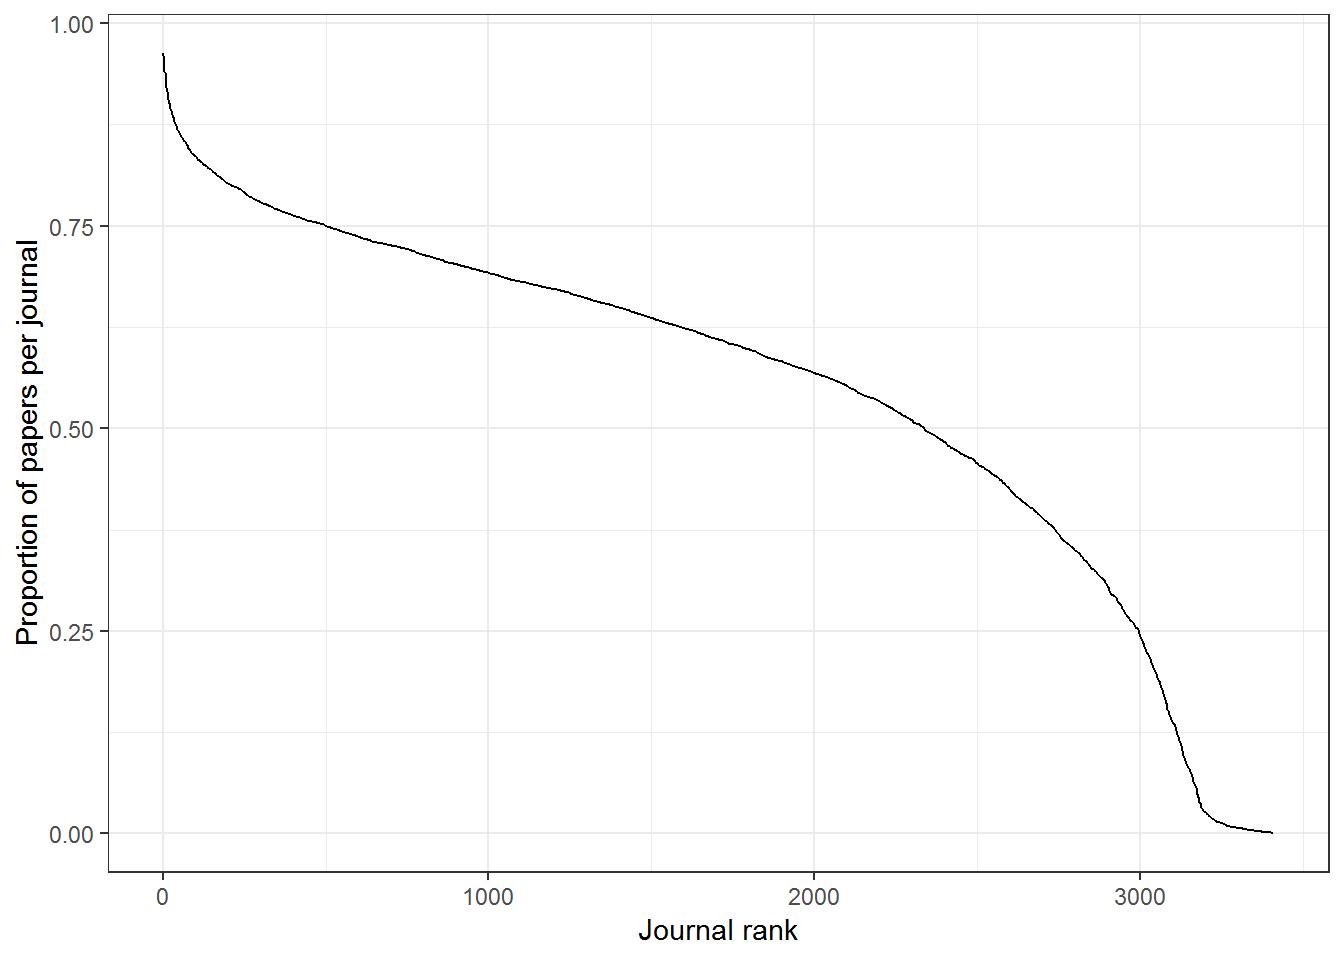


**Figure 7-figure supplement 1.** Percentage of papers per journal included in the analysis.
