# Supplementary material for: Gender variations in citation distributions in medicine are very small and due to self-citation and journal prestige
Source: eLife journal article supplement (doi:10.7554/elife.45374), 2019-07-15
Supplement: supp [file elife_poa_e45374_Figure_7_figure_supplement_3.docx]

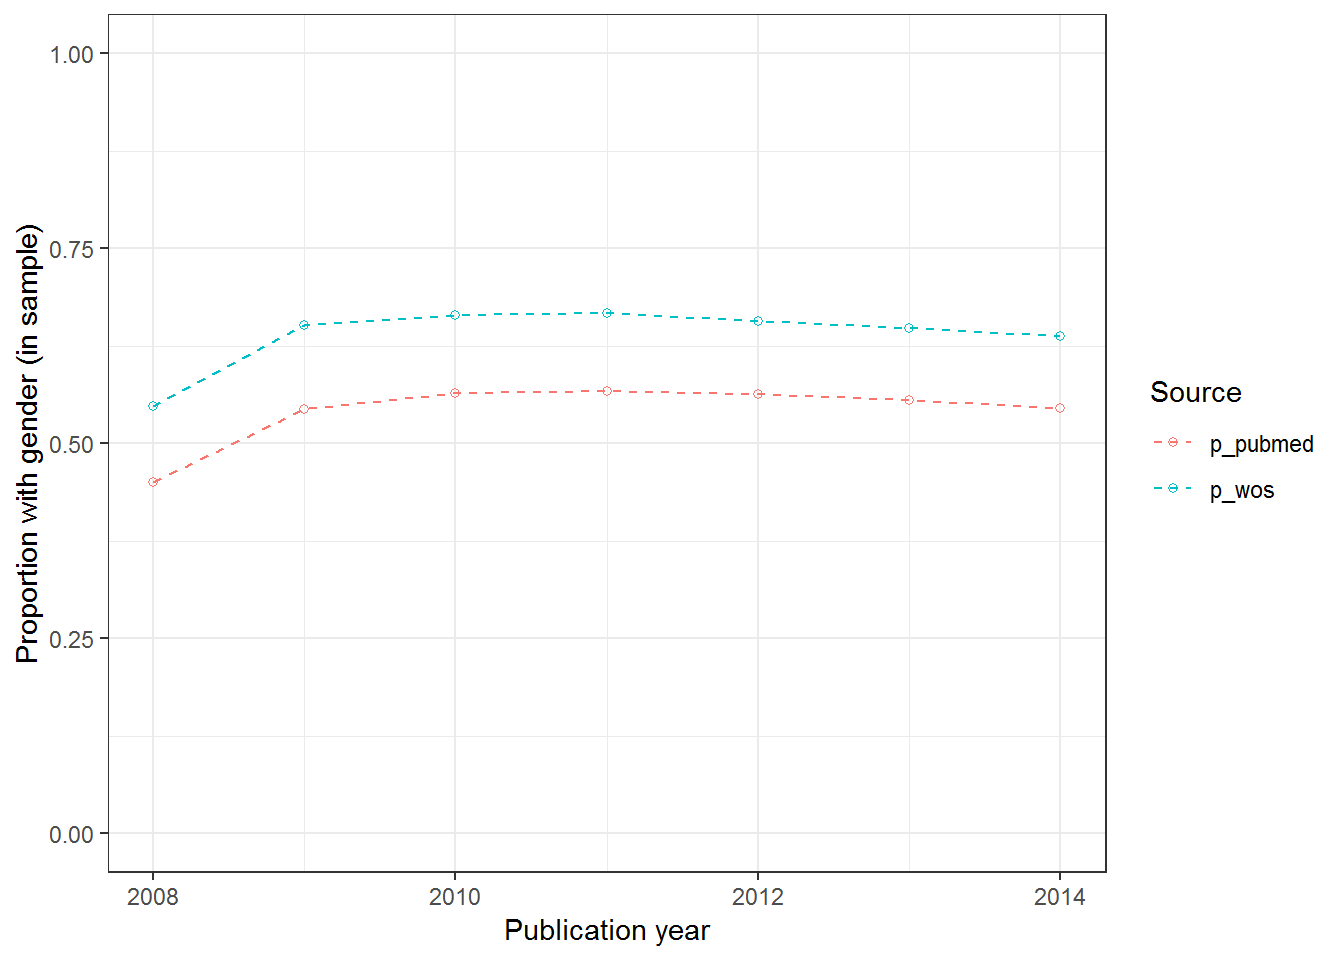


**Figure 7-figure supplement 3.** Proportion of papers with gender assignment for all authors. Reported as function of all sampled papers (p_pubmed) and proportion of all papers matched to Web of Science (p_wos)
